# Supplementary material for: Modulation of amyloid fibrillation of bovine β-lactoglobulin by selective methionine oxidation
Source: Royal Society of Chemistry journal article supplement (doi:10.1039/d0ra09060c), 2021-01-01
Supplement: d0ra09060c1.pdf [file d0ra09060c1.pdf]

## **Modulation of amyloid fibrillation of bovine $\beta$ -lactoglobulin by selective methionine oxidation**

Sanhita Maity,<sup>a</sup> Nayim Sepay,<sup>a</sup> Sampa Pal,<sup>a</sup> Subrata Sardar,<sup>a</sup> Hasan Parvej,<sup>a</sup> Swarnali Pal,<sup>a</sup> Jishnu Chakraborty,<sup>b</sup> Anirban Pradhan,<sup>c</sup> and Umesh Chandra Halder<sup>a\*</sup>

<sup>a</sup>*Department of Chemistry, Jadavpur University, Kolkata 700032, India. E-mail address:*  
[uhalder2002@yahoo.com](mailto:uhalder2002@yahoo.com)

<sup>b</sup>*Department of Chemistry, Camellia Institute of Engineering and Technology, Budbud, Burdwan, WB, India.*

<sup>c</sup>*Department of Chemistry, Ramakrishna Mission Residential College (Autonomous), Vivekananda Centre for Research, Narendrapur, Kolkata -700103, India.*

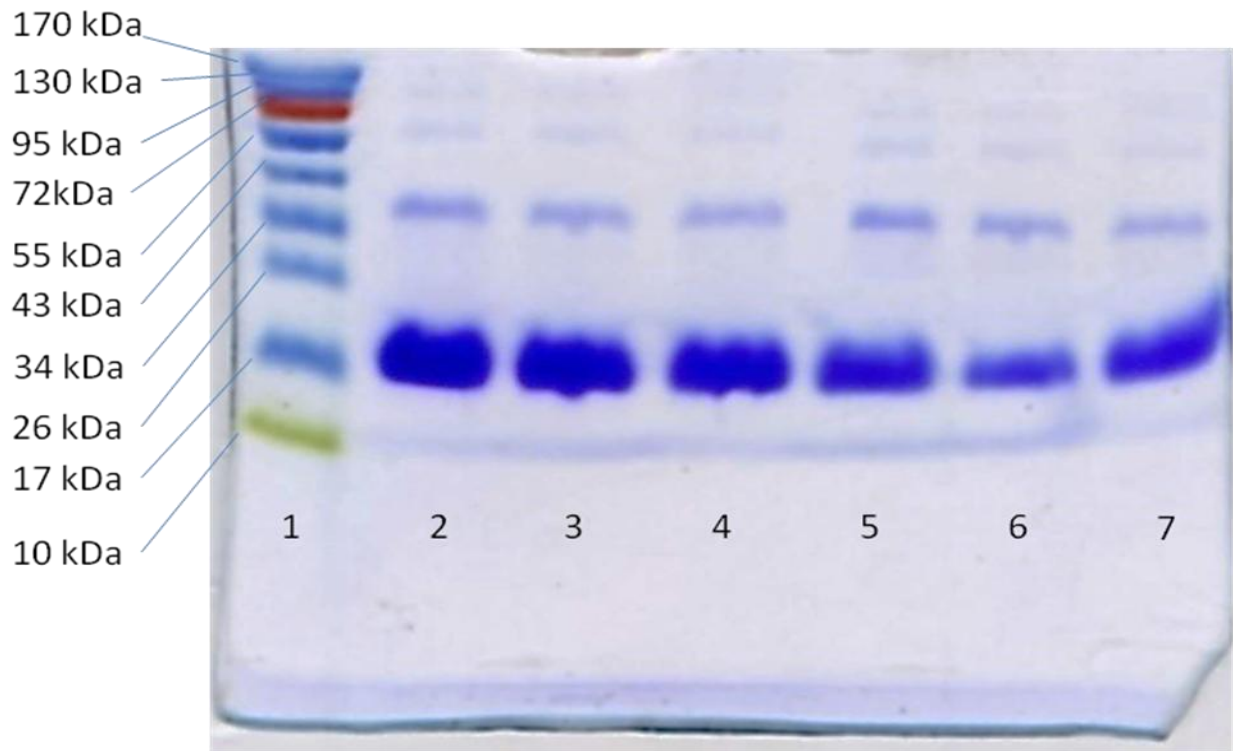

**Figure S1.** Represents SDS-PAGE (12%) patterns of ox- $\beta$ -Ig (lane 2,3,4) and native  $\beta$ -Ig (lane 5,6,7). Lane 1 represents protein marker (Page Ruler,™,Prestained Protein Ladder, 10,17,26,34,43,55,72,95,130 and 170 kDa respectively; Fermentus Life Science, # SM0671). Both the sample ( $\beta$ -Ig and ox- $\beta$ -Ig) concentrations were kept at 108 mM .

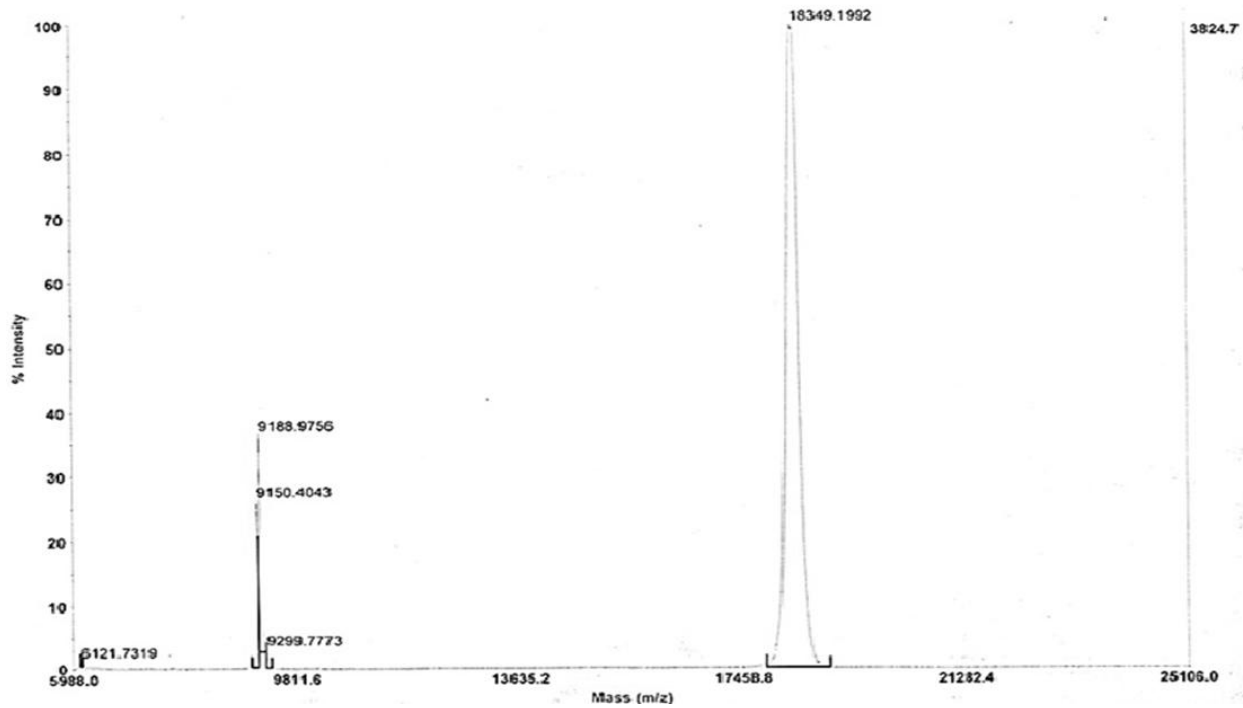

Figure S2A.

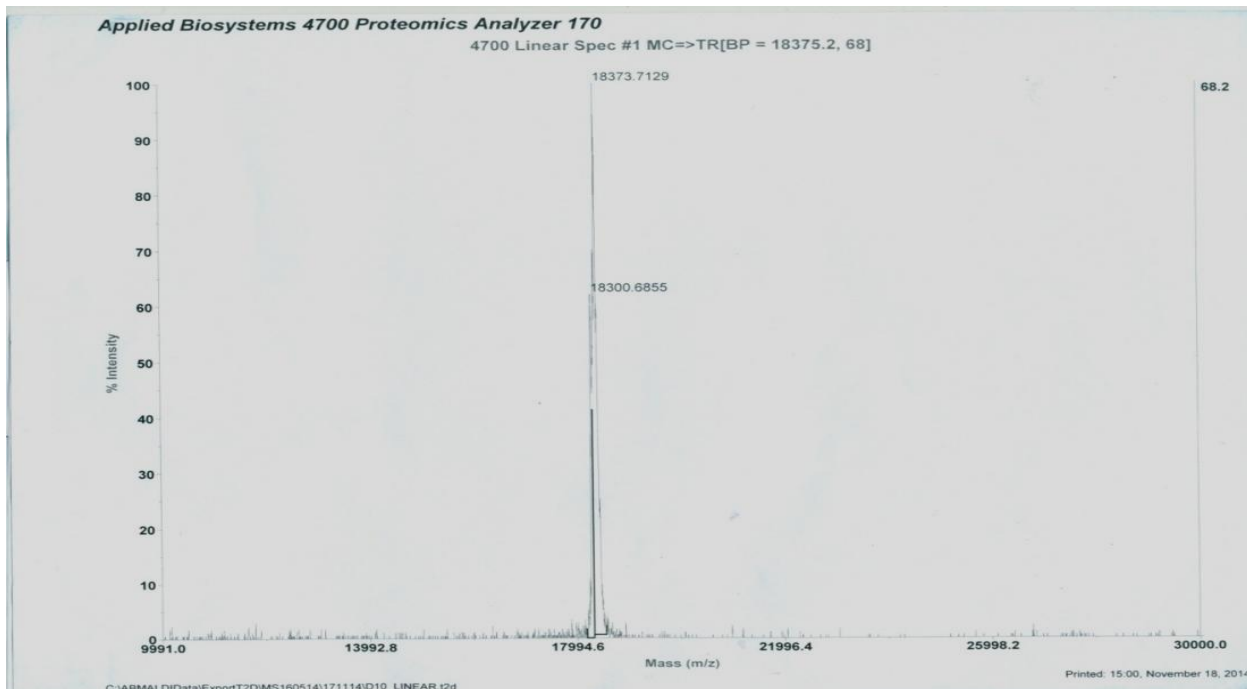

Figure S2B.

**Figure S2.** MALDI spectrum of (A) oxidised  $\beta$ -Lg (ox- $\beta$ -Lg), and (B) native  $\beta$ -Lg, prepared with 50% (v/v) acetonitrile (ACN) in 0.1% (v/v) trifluoroacetic acid (TFA) and 10 mM phosphate buffer at pH 7.4.

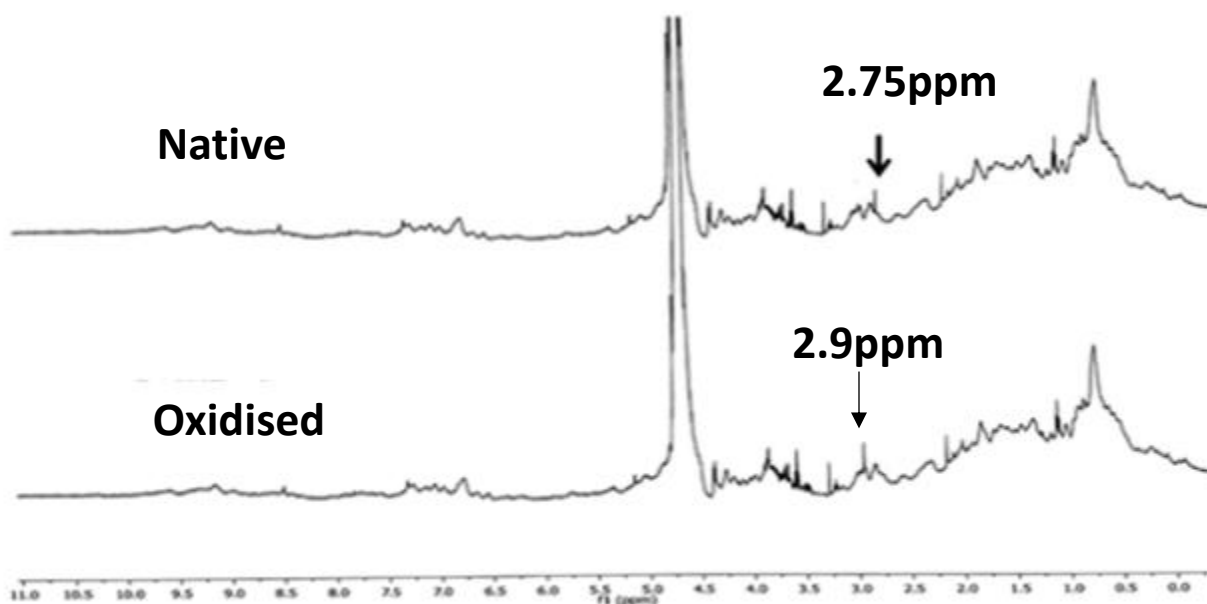

**Figure S3.** represents 1D  $^1\text{H}$  NMR spectra of native and oxidized  $\beta$ -lg (100  $\mu\text{M}$ ) in deuterated phosphate buffer (50 mM, pD7.4) in  $\text{D}_2\text{O}$  recorded at 25  $^\circ\text{C}$ .

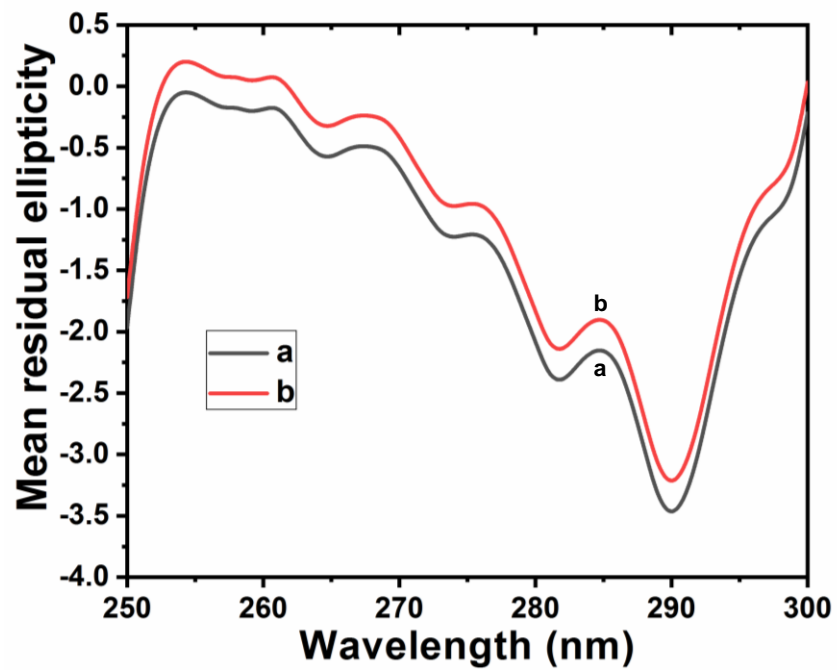

**Figure S4.** Near-UV CD spectrum of native  $\beta$ -Lg (profile a) and ox- $\beta$ -Lg (profile b) in 10 mM phosphate buffer at pH 7.4 at room temperature. Both the sample concentrations were kept at 54.3  $\mu$ M.

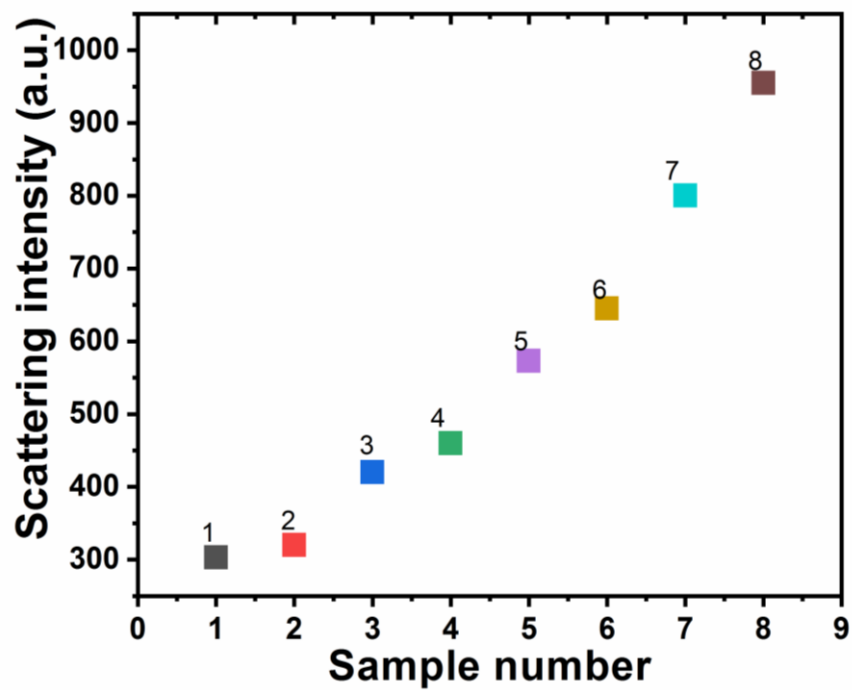

**Figure S5.** Rayleigh Light Scattering data (turbidity measurements) of native  $\beta$ -Lg (1) and ox- $\beta$ -Lg (3) and incubated  $\beta$ -Lg and ox- $\beta$ -Lg for 2 h at 37 °C (2, 4) 65 °C (5, 6) and 80 °C (7,8) respectively. The samples were excited and emitted at 350 nm.

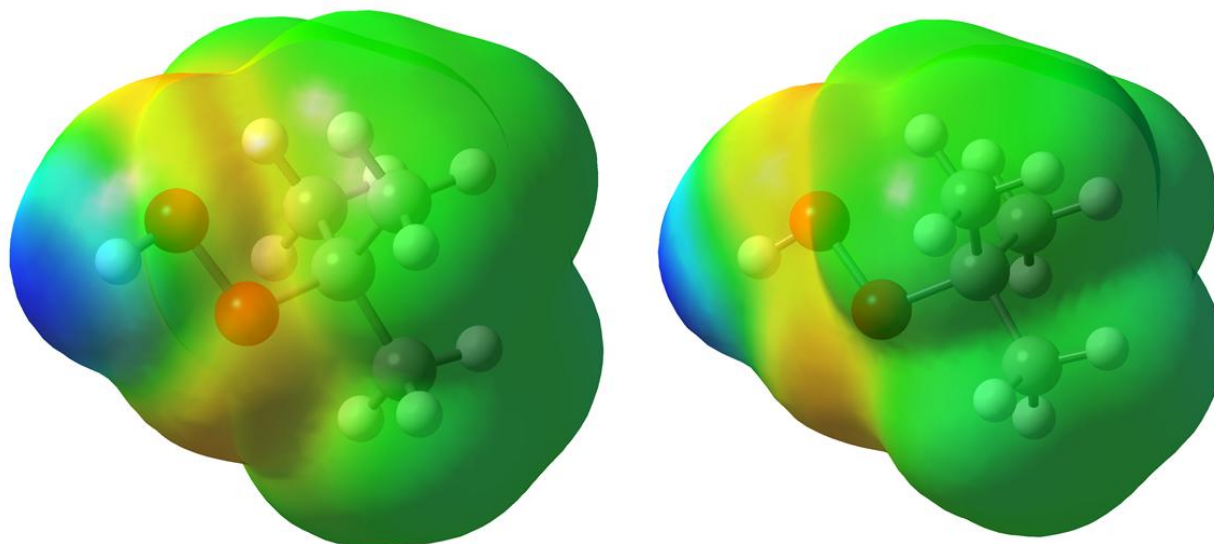

**Figure S6.** Molecular electrostatic potential map of *t*BHP.

## Experimental

### Methods

#### Mass spectrometric analysis

To confirm the oxidation of methionine residues of  $\beta$ -lg, mass spectrometric analysis was performed on *t*BHP-treated  $\beta$ -lg as the oxidized  $\beta$ -lg has higher mass. Mass spectra were acquired on an Ultra flex III MALDI-TOF/TOF mass spectrometer (BrukerDaltonics) in reflector mode using Flex Control (BrukerDaltonics). The ox- $\beta$ -lg samples were prepared with 50% (v/v) acetonitrile (ACN) in 0.1% (v/v) trifluoroacetic acid (TFA). The concentrations of all the samples were 1  $\mu$ g/1  $\mu$ L.

#### NMR spectroscopy

Native and ox- $\beta$ -lg (108  $\mu$ M) were dissolved in 50 mM deuterated phosphate buffer (pH 7.4 in D<sub>2</sub>O). Spectra were acquired at 25 °C at 600 MHz on a Varian 600 Inova NMR spectrometer. Spectra were processed and analyzed using the Sparky 3.106 software package (Freeware).

#### Intrinsic fluorescence

All intrinsic and extrinsic fluorescence measurements were performed on a Shimadzu spectrofluorimeter (Shimadzu 5301 PC) at 25 °C by using 1 cm quartz cuvette. Intrinsic fluorescence experiments were performed with protein concentration at 13.6  $\mu$ M. To monitor the intrinsic fluorescence of  $\beta$ -lg, protein samples were excited at 295 nm and the emission spectra were recorded between 310 nm and 400 nm. The excitation and emission slits were set at 3 nm and 5 nm respectively for all fluorescence measurements. All the experiments were performed at least three times.

#### 8-anilinonaphthalene-1-sulfonic acid (ANS) titration study

ANS titration assays were performed by adding small aliquots of concentrated ANS solution to protein solution. Oxidized  $\beta$ -lg (ox- $\beta$ -lg) and  $\beta$ -lg concentrations were about 13.6  $\mu$ M and molar ratio [ANS]/ [protein] was varied in the range 0.1 - 2.8. Dilutions on ANS never exceeded 5% of the starting volume. Protein samples were excited at 370 nm and emission was measured at 510 nm.

**Table S1:** Structural integrities of native ( $\beta$ -Lg and ox- $\beta$ -Lg) and incubated ( $\beta$ -Lg and ox- $\beta$ -Lg for 4 h at 37 °C, 65 °C and 80 °C) samples were determined by CDNN 2.1 software.

| <b>Samples</b>                        | <b>% of <math>\alpha</math>-helix</b> | <b>% of <math>\beta</math>-sheet</b> | <b>% of <math>\beta</math>-turn</b> | <b>% of Random coil</b> |
|---------------------------------------|---------------------------------------|--------------------------------------|-------------------------------------|-------------------------|
| Native $\beta$ -lg                    | 28.7                                  | 18.8                                 | 19.8                                | 32.7                    |
| Ox- $\beta$ -lg                       | 30.6                                  | 17.7                                 | 18.8                                | 33                      |
| $\beta$ -lg (incubated at 37 °C )     | 30.4                                  | 19                                   | 18.6                                | 32.1                    |
| Ox- $\beta$ -lg ( incubated 37 °C )   | 28.7                                  | 19.78                                | 17.7                                | 33.8                    |
| $\beta$ -lg ( incubated at 65 °C )    | 19.3                                  | 25.16                                | 18.8                                | 36.9                    |
| Ox- $\beta$ -lg ( incubated at 65 °C) | 17.16                                 | 26.19                                | 18.51                               | 38.2                    |
| $\beta$ -lg ( incubated at 80 °C )    | 14.23                                 | 28.04                                | 18.37                               | 39.34                   |
| Ox- $\beta$ -lg ( incubated at 80 °C) | 13.6                                  | 28.3                                 | 18.12                               | 39.9                    |
